# Supplementary material
Source: publisher figshare collection journal article supplement (https://acs.figshare.com/ndownloader/files/5159041)
Supplement: Supplementary file 1 [file 5159041]

# Interweaving 3D Network with Double Helical tubes Filled by 1D

## Coordination Polymer Chains

E Yang, Jian Zhang, Zhao-ji Li, Song Gao, Yao Kang, Yu-biao Chen, Yi-hang Wen,  
Yuan-gen Yao\*

### Experimental Section

Mellitic acid (0.086g, 0.25mmol), 4,4'-bpy (0.080g, 0.50mmol) and  $\text{Cu}(\text{CH}_3\text{COO})_2 \cdot \text{H}_2\text{O}$  (0.150g, 0.75mmol) in 15ml  $\text{H}_2\text{O}$  was heated at  $145^\circ\text{C}$  for 3 days in a Teflon-lined 23ml bomb, and blue crystals were obtained. (Anal. Calc. for  $\text{C}_{32}\text{H}_{28}\text{Cu}_3\text{N}_4\text{O}_{18}$ : C, 40.58; H, 2.98; N, 5.91. Found: C, 40.38; H, 2.58; N, 6.03). IR (KBr/pellet)/ $\text{cm}^{-1}$ : 3434vs, 1634vs, 1613s, 1563ms, 1544sh, 1422vs, 1398sh, 1334ms, 1221w, 1080w, 1067w, 904m, 839m, 818s, 645s.

Crystal data were measured as follows:  $\text{C}_{32}\text{H}_{28}\text{N}_4\text{O}_{18}\text{Cu}_3$ ,  $M_r = 947.20$ , blue crystal ( $0.52 \times 0.32 \times 0.26\text{mm}$ ), Monoclinic, space group  $P2_1/c$ ,  $a = 10.173(4) \text{ \AA}$ ,  $b = 11.1598(4) \text{ \AA}$ ,  $c = 14.8557(5) \text{ \AA}$ ,  $\beta = 107.0350(10)^\circ$ ,  $V = 1613.07(10) \text{ \AA}^3$ ,  $Z = 2$ ,  $T = 293(2) \text{ K}$ ,  $\rho_{\text{calcd}} = 1.950 \text{ g.cm}^{-3}$ ,  $F(000) = 958$ ,  $\mu = 2.057 \text{ mm}^{-1}$ ,  $R1(wR2) = 0.0417(0.1071)$  and  $S = 1.068$  for 2817 reflections with  $F_o > 4\sigma(F_o)$ .

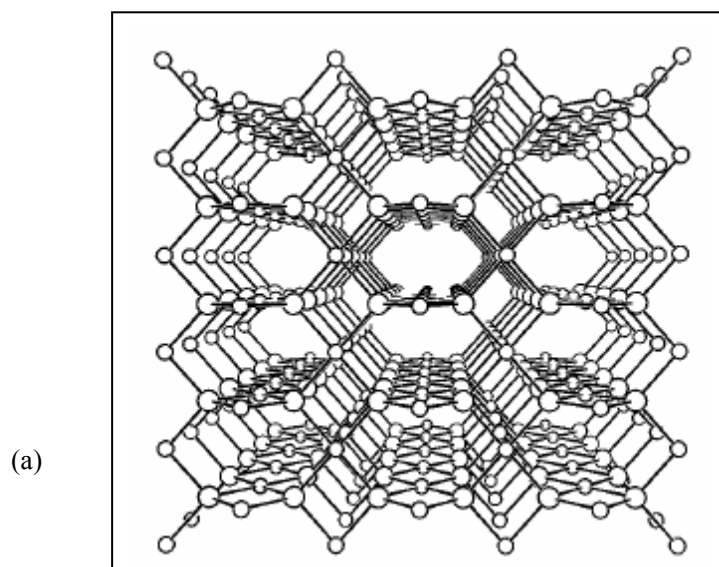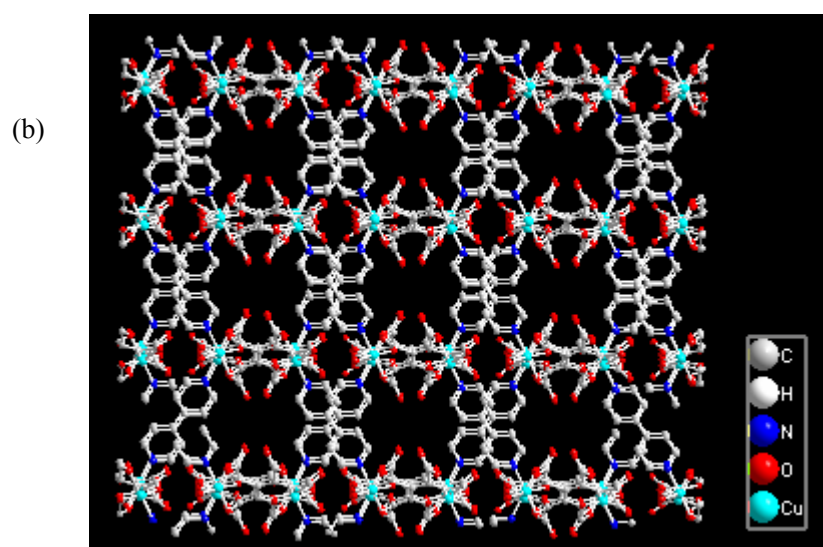

**Figure S1.** (a) The PtS-like net.; (b) Two interpenetrating PtS-like nets in the structure of host network, view along the [001] face.

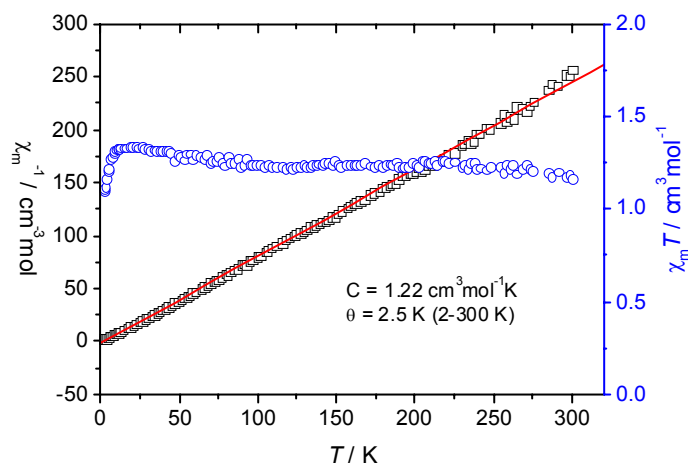

**Figure S2.** Experiment  $\chi_M T$  versus  $T$  curves for the complex.

The temperature dependence of the magnetic susceptibility data obeys the Curie-Weiss law with  $C = 1.22 \text{ cm}^3 \cdot \text{mol}^{-1} \cdot \text{K}$ , and  $\theta = 2.5 \text{ K}$ , the  $C$  value is consistent with the expected value 1.125 for three spin-only Cu(II) ions, the small positive  $\theta$  suggests a possible very weak ferromagnetic interactions between the Cu(II) ions (Figure S2).

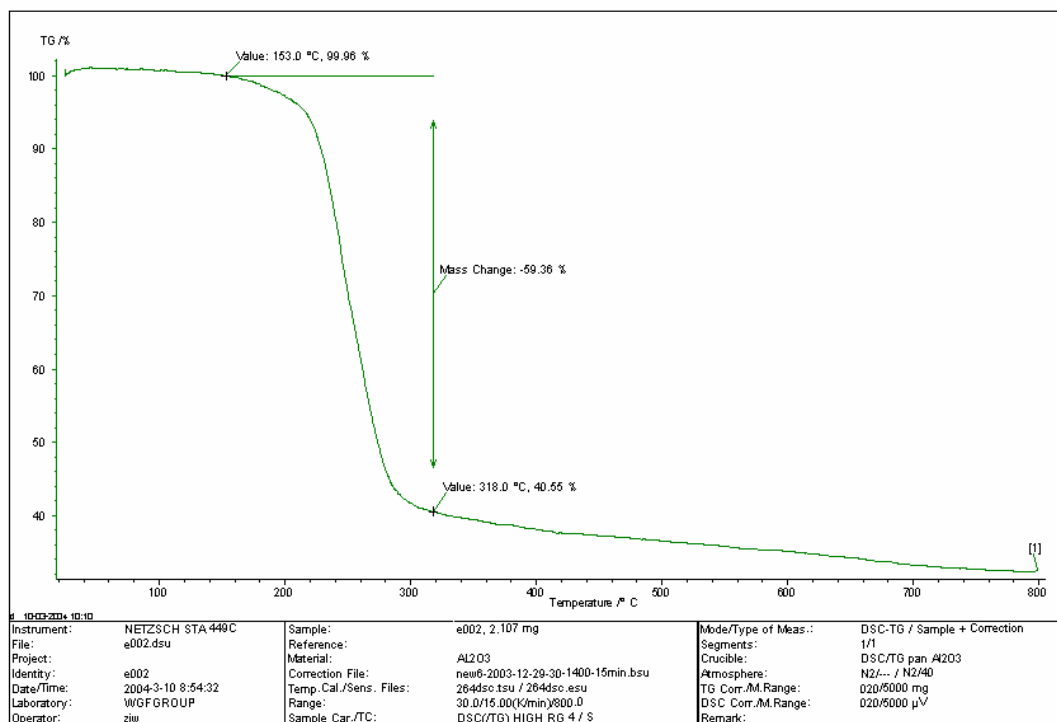

**Figure S3.** The thermogravimetric analysis (TGA) versus  $T$  curves for the complex.

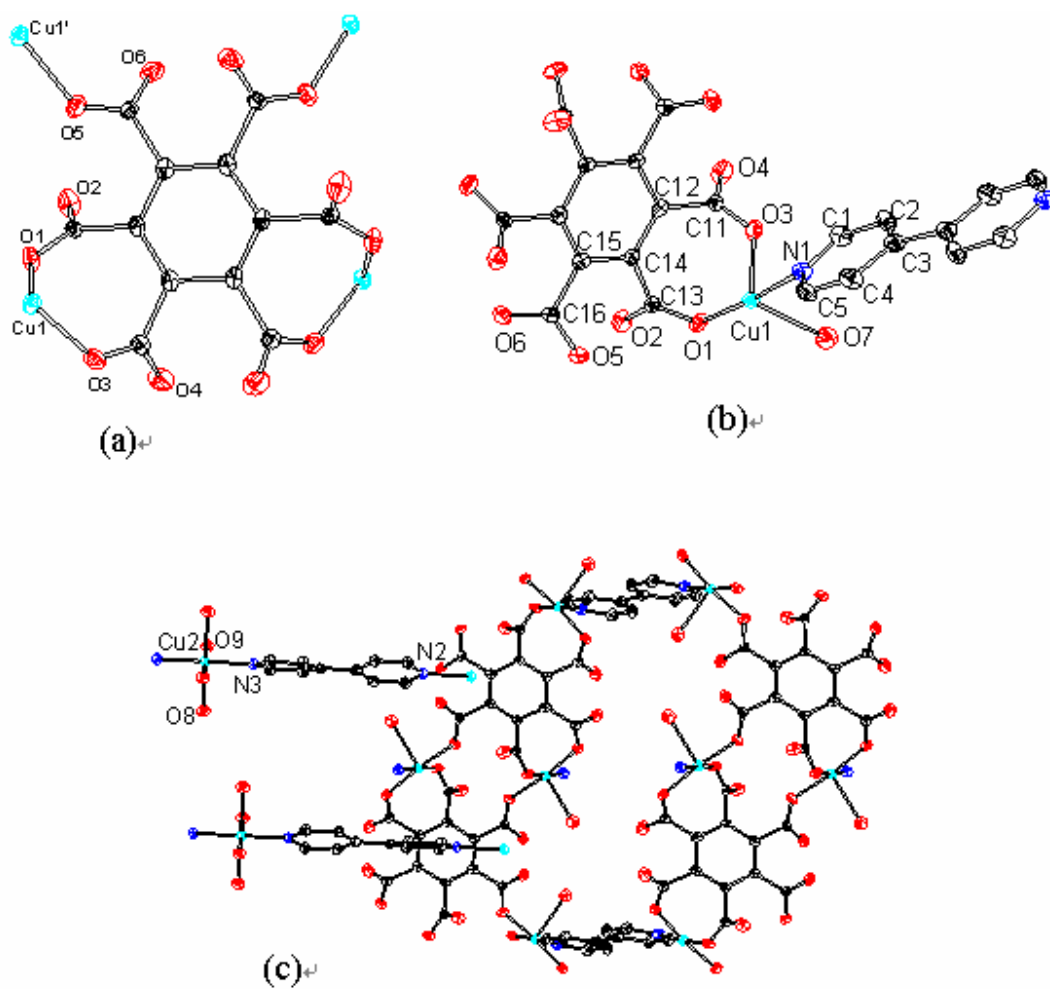

**Figure S4.** (a) The coordination of mellitate; (b) local coordination environment of Cu(II); (c) ORTEP representation of cell framework of the complex ( only one host polymer is present ), a view along the [100] direction, H atoms were omitted for clarity.

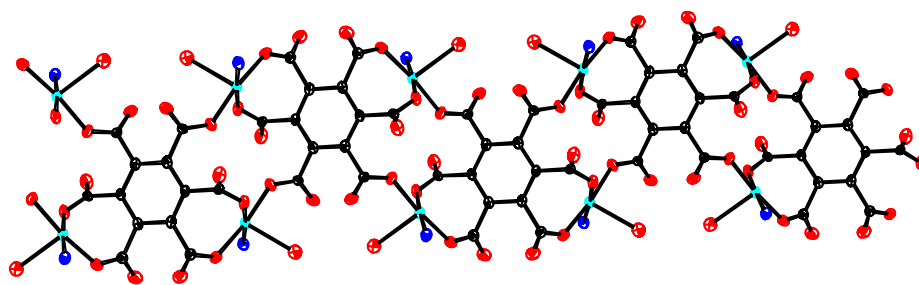

**Figure S5.** The mellitate zigzag chain, Cu=sky blue, O=red, N=deep blue.
